# Supplementary material for: 4-(diphenylphosphoryl)-1-phenylbutane-1,3-dione
Source: Preprints.org preprint supplement (doi:10.20944/preprints202312.0553.v1), 2023-12-08
Supplement: Supplementary file 1 [file supplementary]

Supplementary Materials

**4-(diphenylphosphoryl)-1-phenylbutane-1,3-dione**

Dmitry Tatarinov 1,2*, Elisa Bajnazarova2, Mohsin Ali *2,3*, Alexey Dovzhenko 1,2, Rustem Zairov 1,2,*, Vladimir F. Mironov 1 and Asiya Mustafina 1

1 Arbuzov Institute of Organic and Physical Chemistry, FRC Kazan Scientific Center, Russian Academy of Sciences, 8 Arbuzov Street, 420088 Kazan, Russia; aleksej_dovghenko@mail.ru (A.D.); mironov@iopc.ru (V.F.M.); asiya@iopc.ru (A.M.)

2 Kazan (Volga Region) Federal University, 18 Kremlyovskaya Street, 420008 Kazan, Russia; [elizabajnazarova@gmail.com](mailto:elizabajnazarova@gmail.com)

***** Correspondence: [datint@iopc.ru](mailto:datint@iopc.ru) (D.T.); [rustem@iopc.ru](mailto:rustem@iopc.ru) (R.Z.);

Copies of NMR spectra for compound 4-(diphenylphosphoryl)-1-phenylbutane-1,3-dione

**Figure S1.** 1H NMR spectra of tautomeric mixture of compound **1** (CDCl3, 400 MHz)

**Figure S2.** 13C NMR spectra of tautomeric mixture of compound **1** (101 MHz, CDCl3)

**Figure S3.** 13C NMR (dept) spectra of tautomeric mixture of compound **1** (101 MHz, CDCl3)

**Figure S3.** 31P {1H} NMR spectra of tautomeric mixture of compound **1** (243 MHz, CDCl3)
